# Supplementary material for: Empirical patterns of environmental variation favor adaptive transgenerational plasticity
Source: PubMed Central journal article supplement (PMC7029079; doi:10.1002/ece3.6022), 2020-01-29

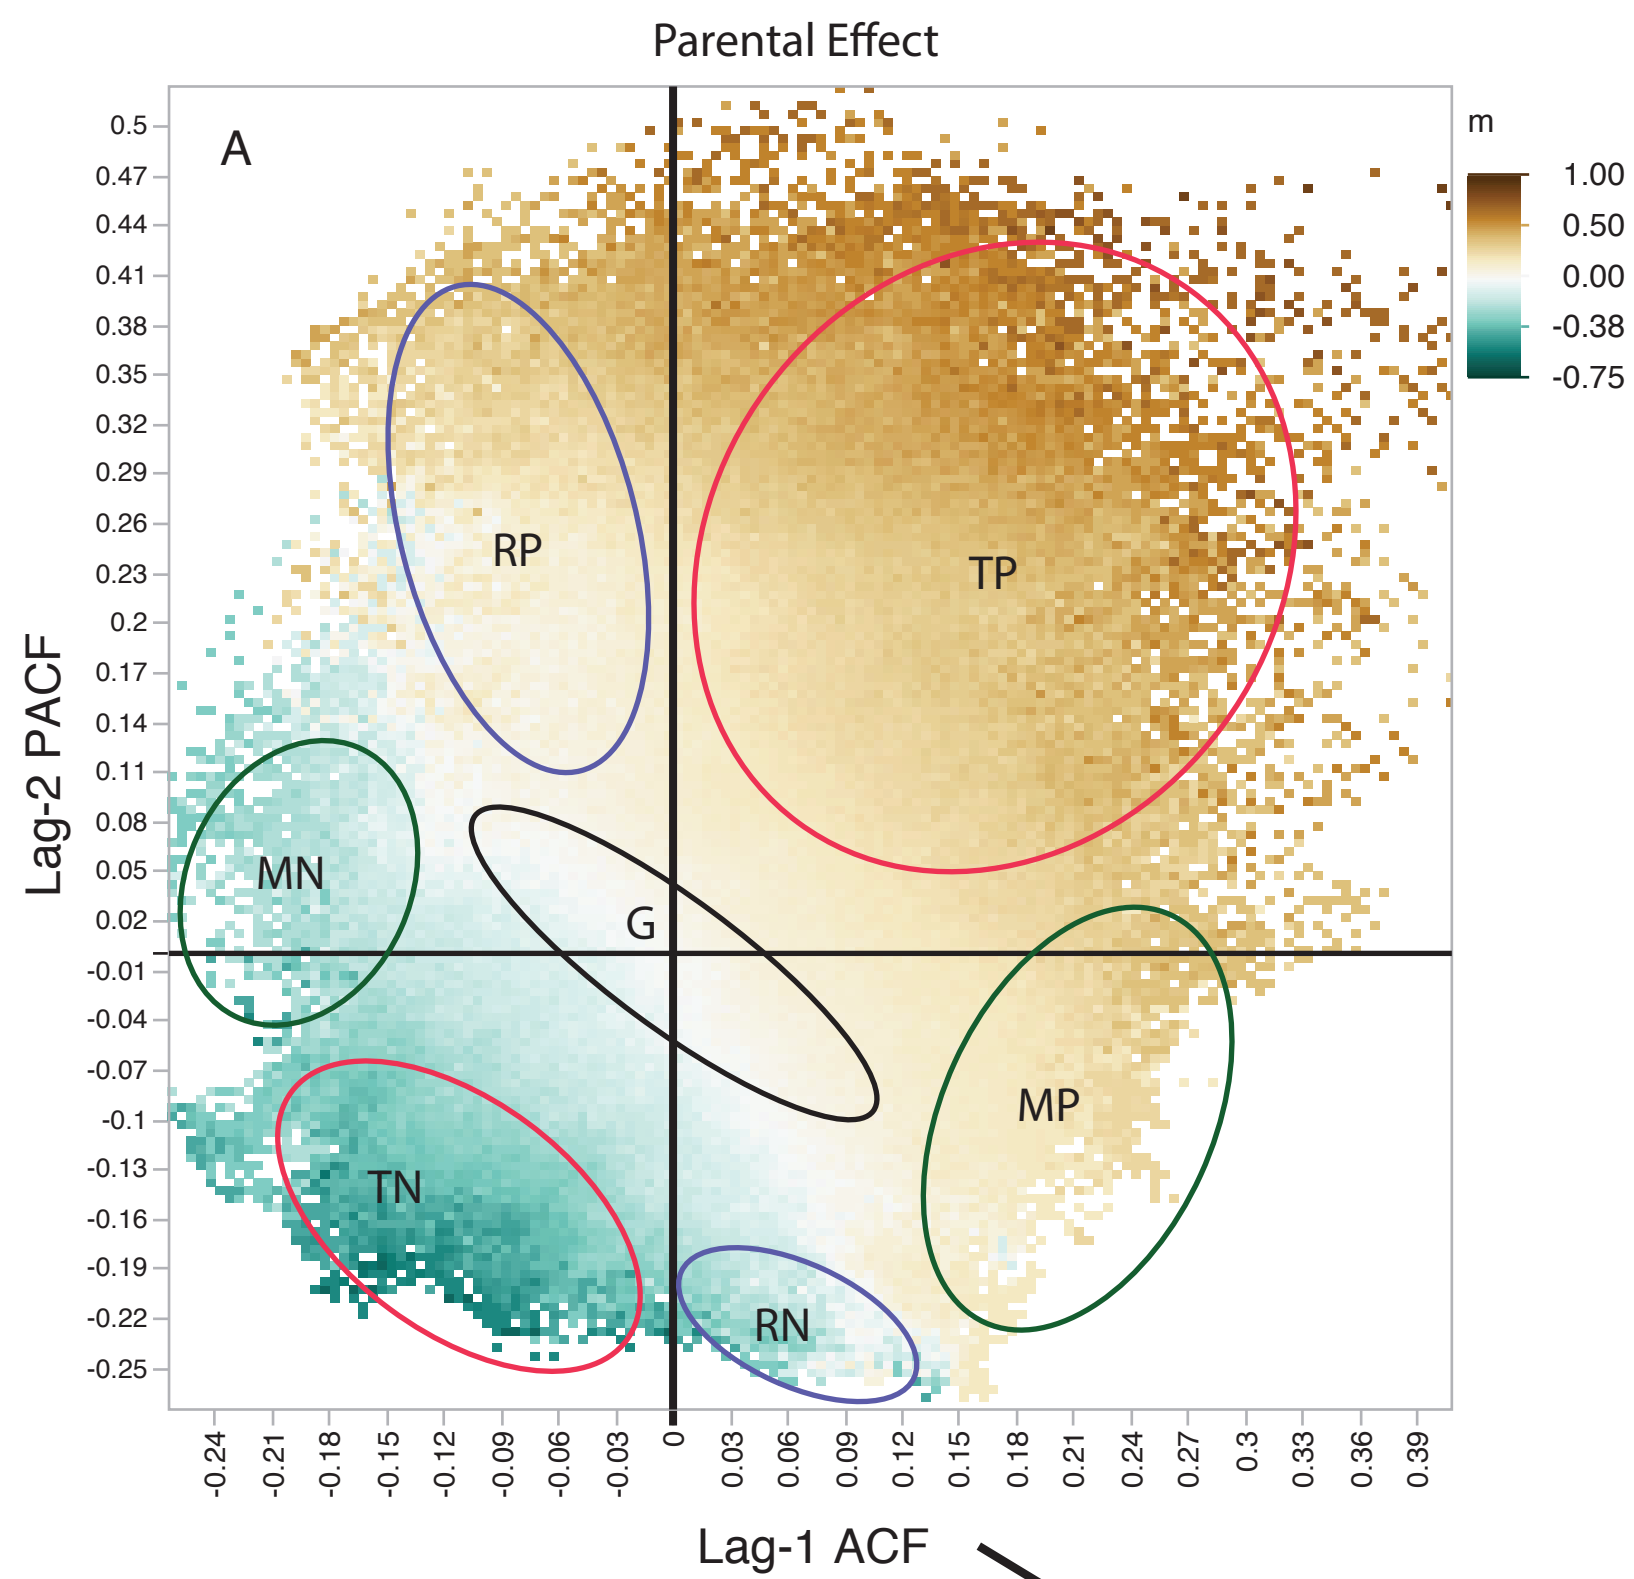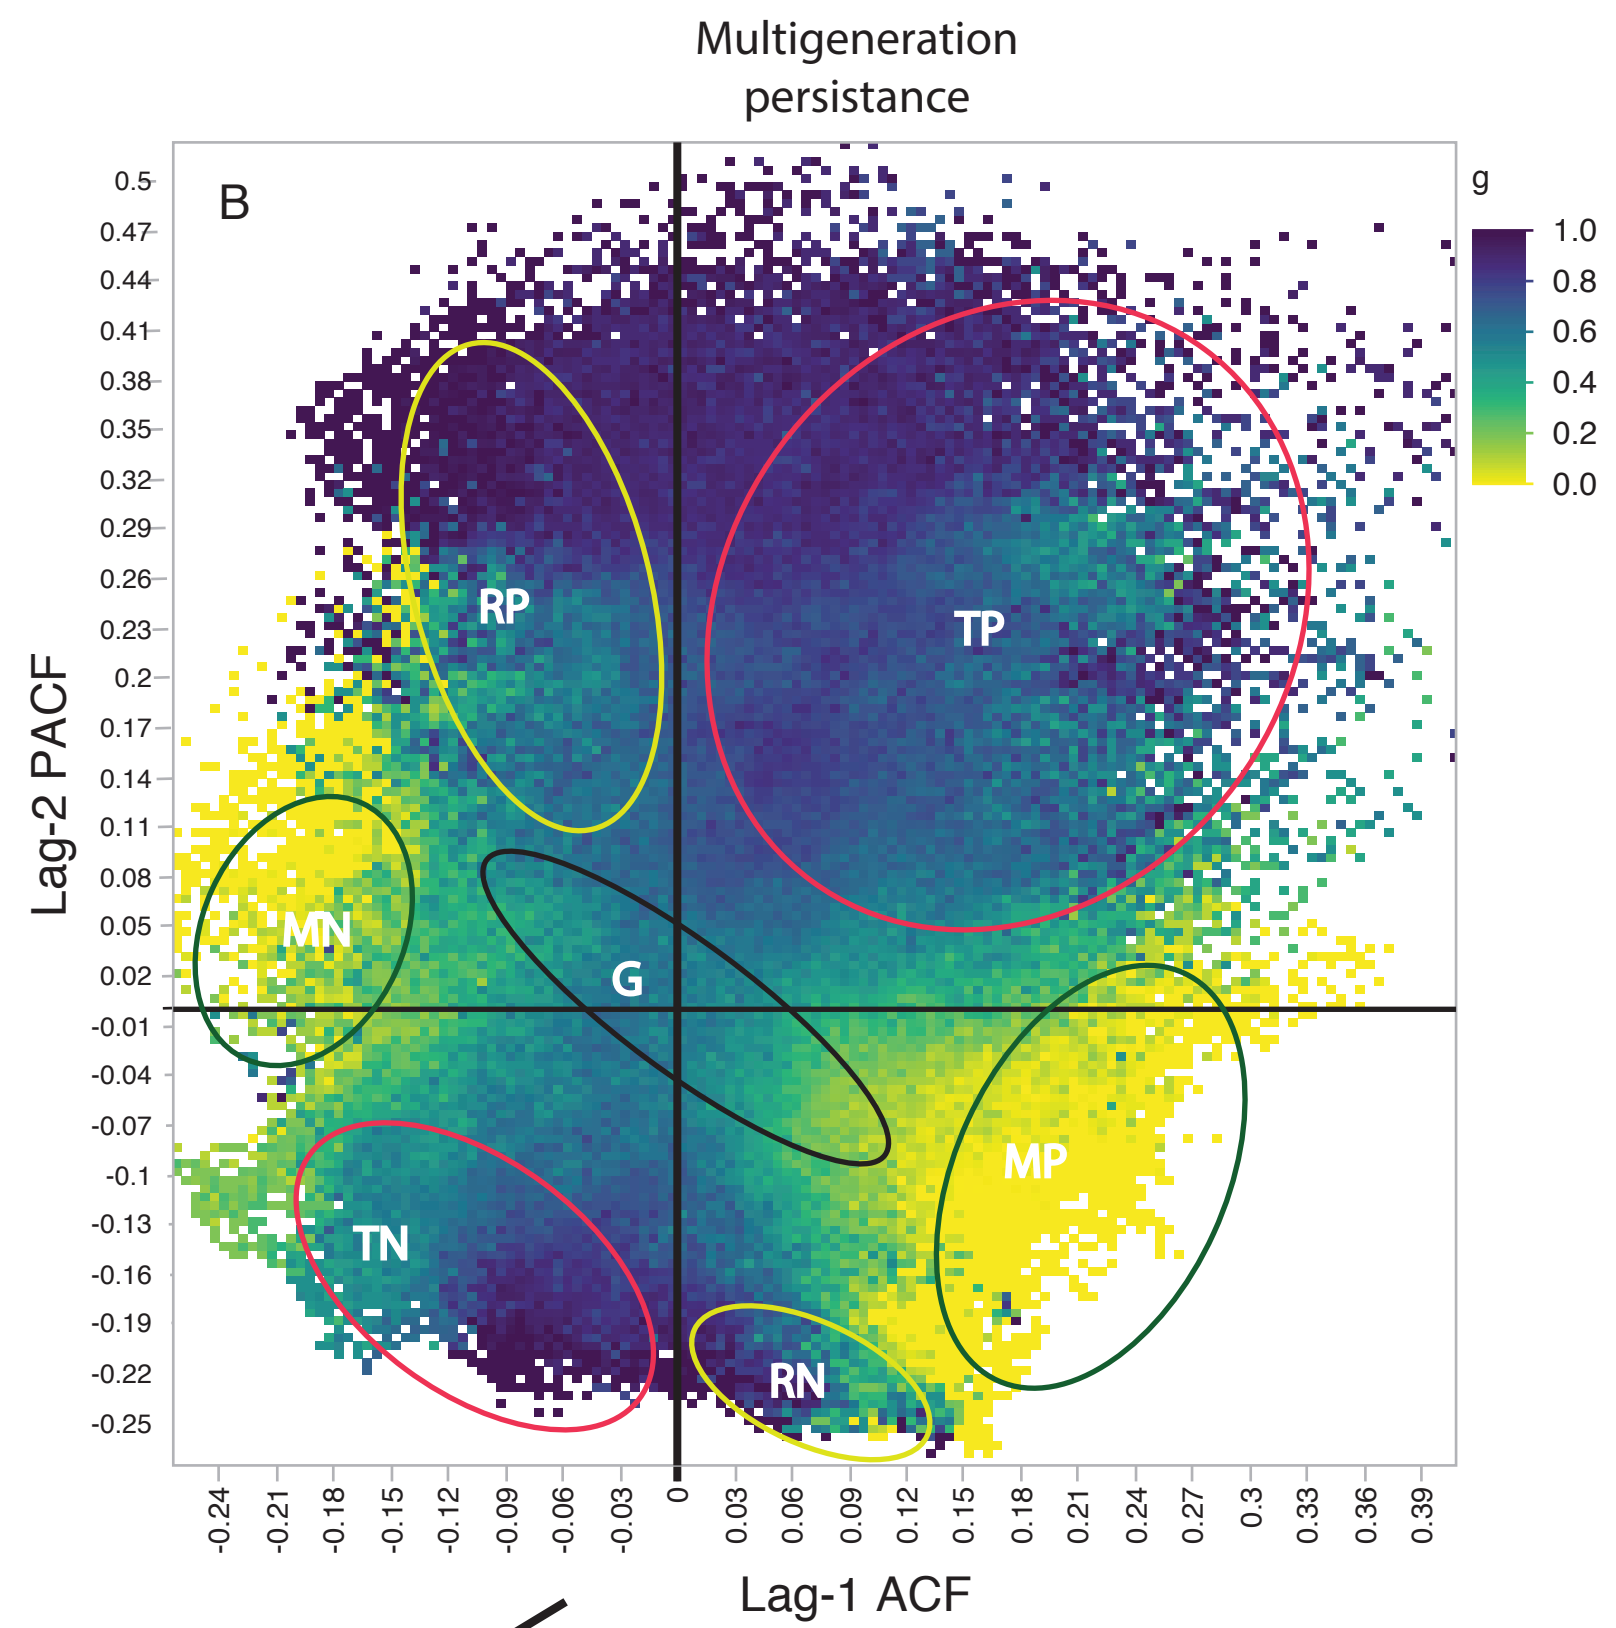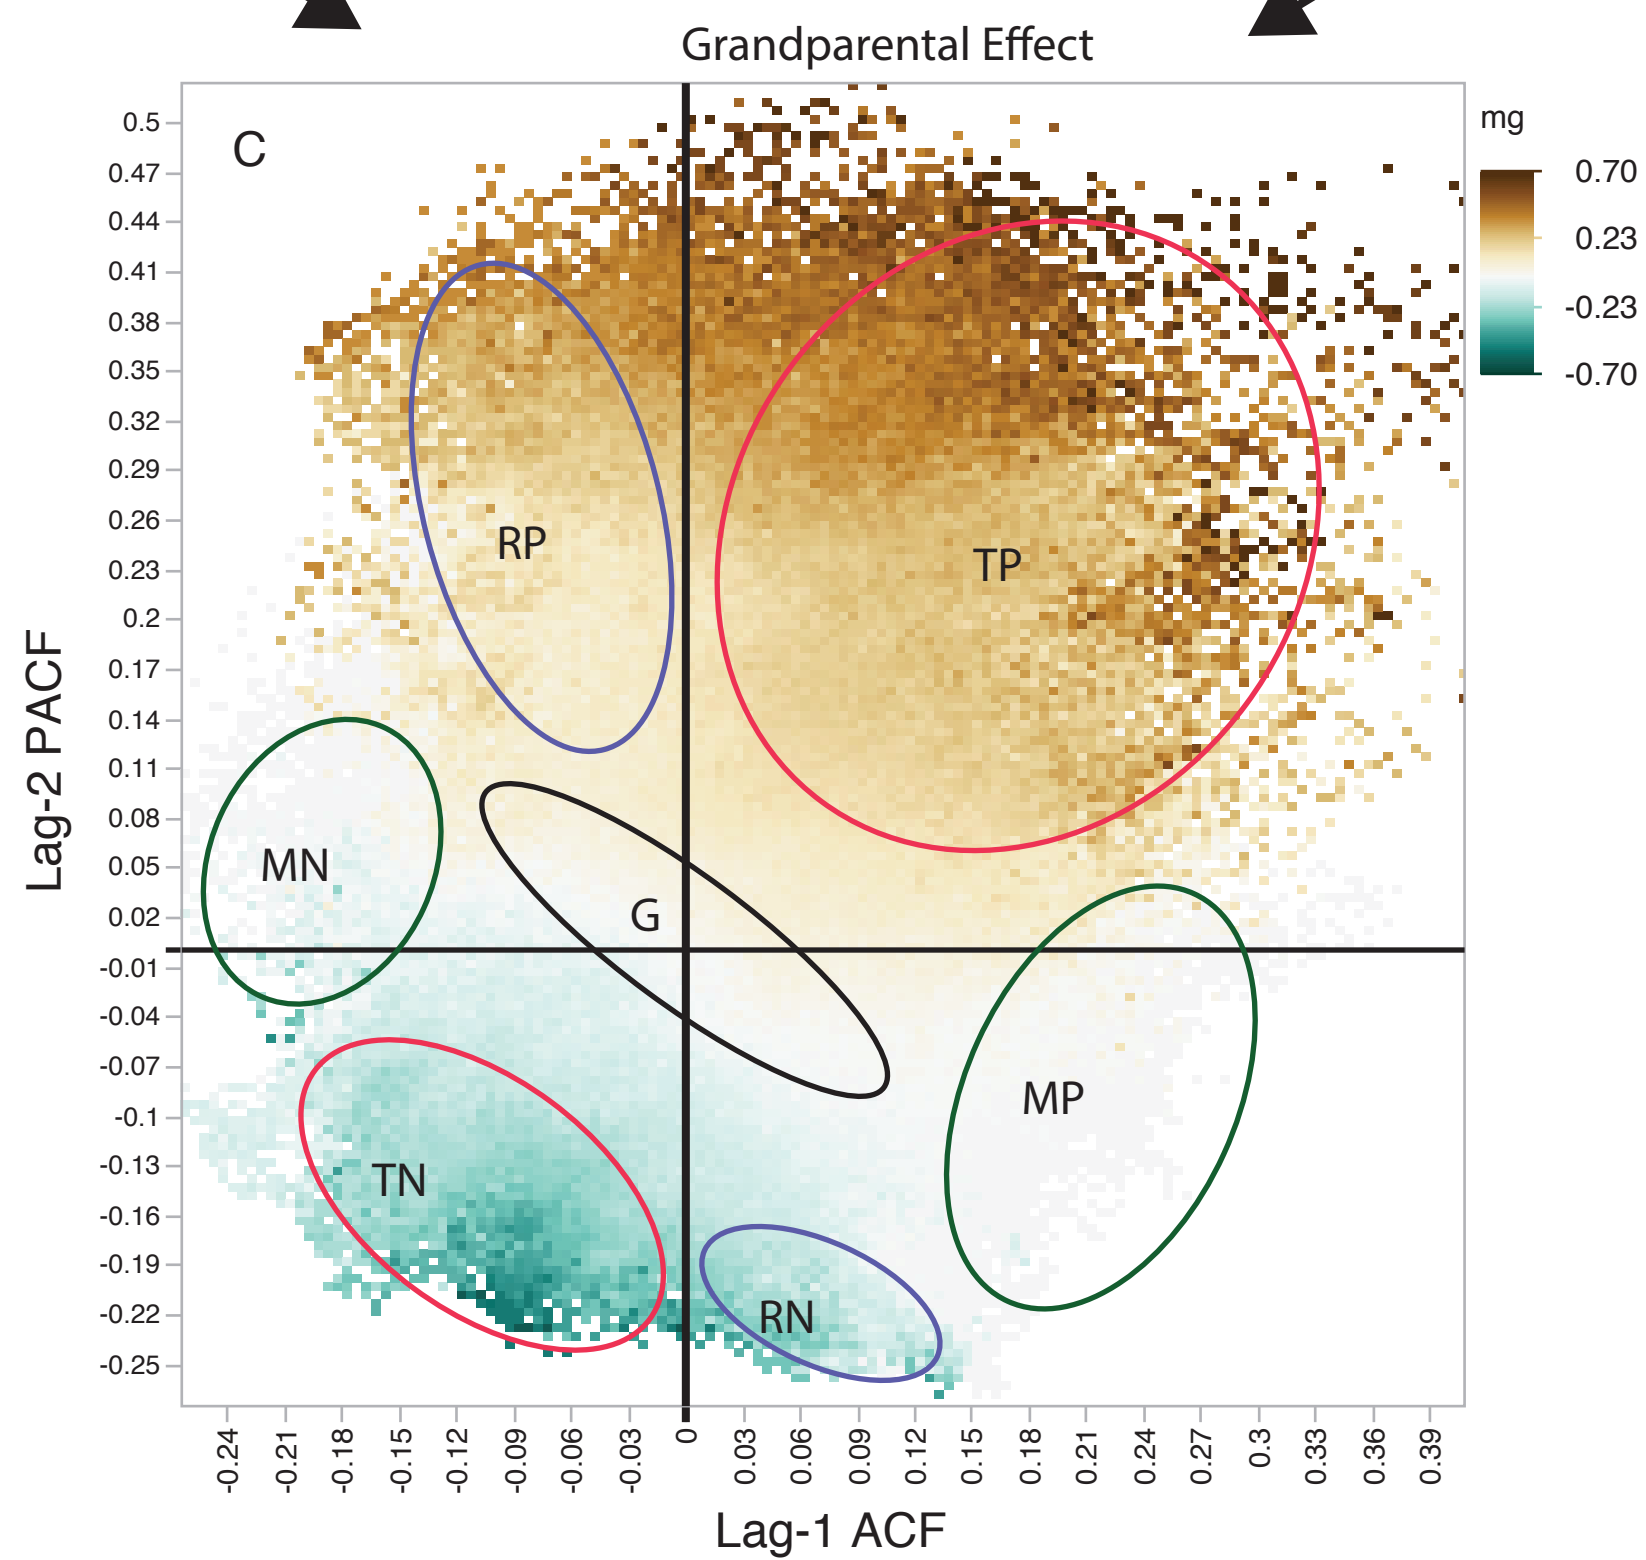

Supplement: ECE3-10-1648-s003.pdf [file ECE3-10-1648-s003.pdf]
