# Supplementary material for: Empirical patterns of environmental variation favor adaptive transgenerational plasticity
Source: PubMed Central journal article supplement (PMC7029079; doi:10.1002/ece3.6022), 2020-01-29

A

## Optimal late-late transgenerational plasticity

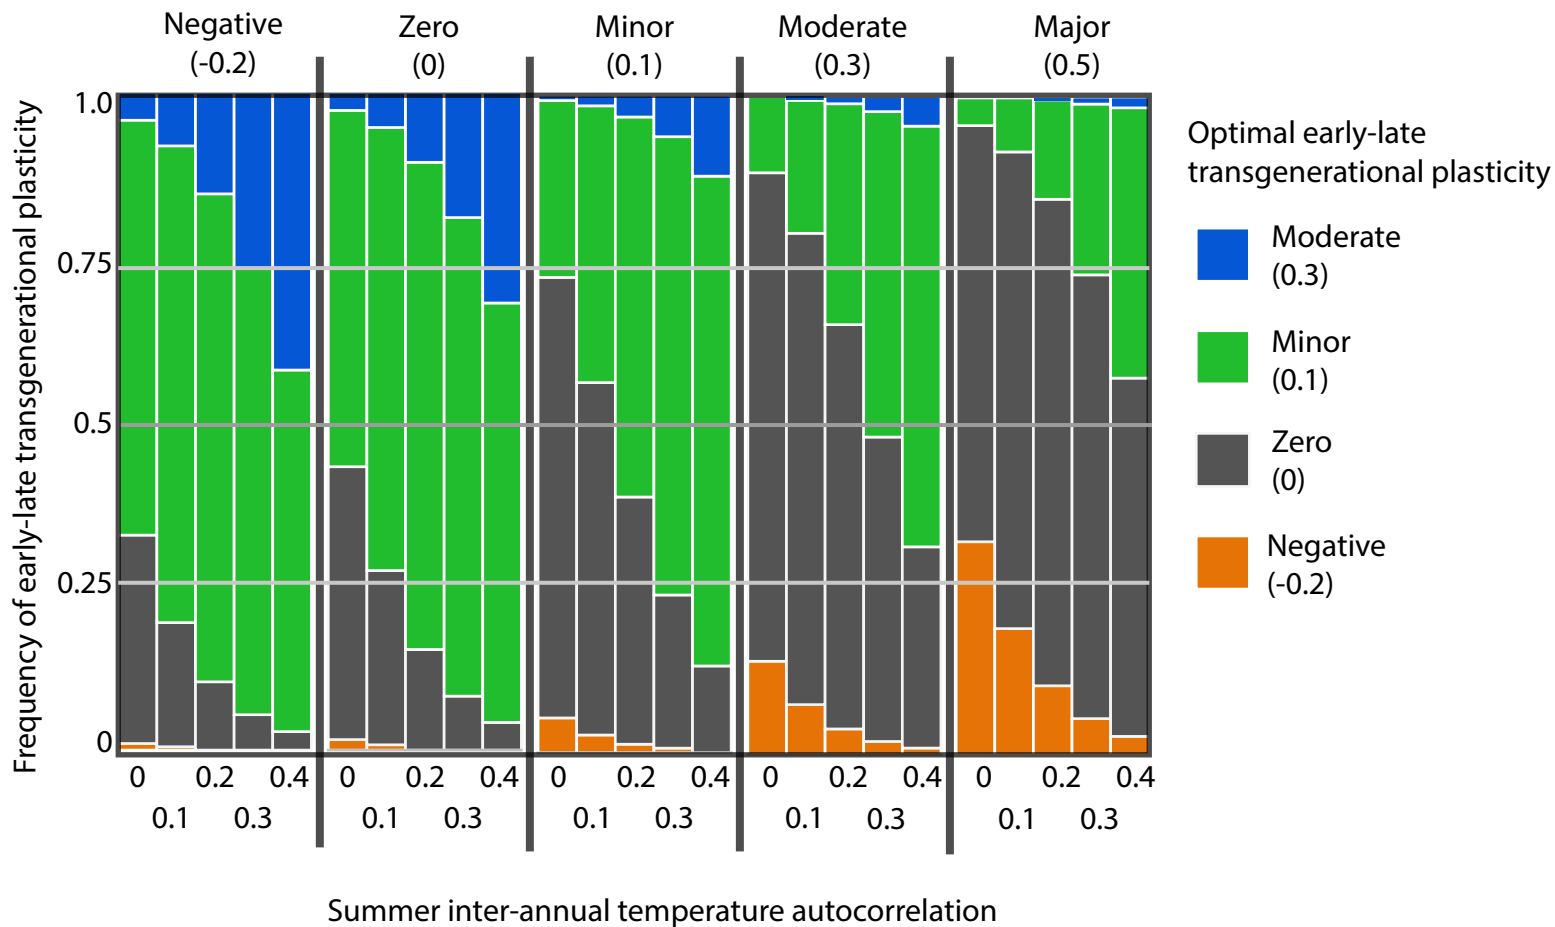

B

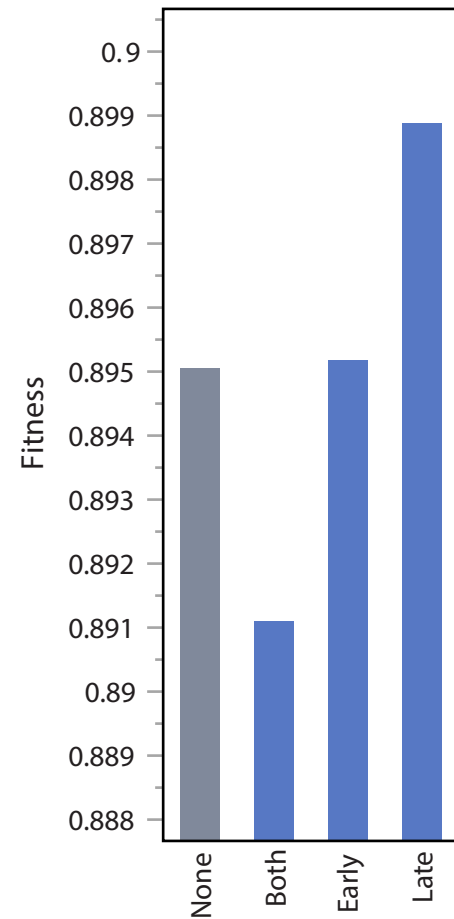

Supplement: ECE3-10-1648-s004.pdf [file ECE3-10-1648-s004.pdf]
